# Supplementary material
Source: PubMed Central journal article supplement (PMC6408961)
Supplement: NIHMS1516903-supplement-Table_S1.pdf [file NIHMS1516903-supplement-Table_S1.pdf]

Supplementary Table 1

| Adverse event                           | Neoadjuvant +          |           | Adjuvant only group |           |
|-----------------------------------------|------------------------|-----------|---------------------|-----------|
|                                         | Any grade              | Grade 3-4 | Any grade           | Grade 3-4 |
|                                         | Number of patients (%) |           |                     |           |
| Treatment-related                       |                        |           |                     |           |
| Any                                     | 14 (93.3)              | 10 (66.7) | 13 (86.7)           | 7 (46.7)  |
| Serious                                 | 8 (53.3)               | 4 (26.7)  | 4 (26.7)            | 4 (26.7)  |
| Led to discontinuation                  | 2 (13.3)               | 2 (13.3)  | 0                   | 0         |
| Led to death                            | 0                      | 0         | 0                   | 0         |
| Occurred in ≥2 patients in either group |                        |           |                     |           |
| Muscle weakness                         | 9 (60.0)               | 2 (13.3)  | 6 (40.0)            | 3 (20.0)  |
| Headache                                | 11 (73.3)              | 0         | 3 (20.0)            | 0         |
| Hyperglycemia                           | 8 (53.3)               | 1 (6.7)   | 3 (20.0)            | 0         |
| Decreased lymphocyte count              | 5 (33.3)               | 1 (6.7)   | 5 (33.3)            | 1 (6.7)   |
| Anemia                                  | 7 (46.7)               | 1 (6.7)   | 3 (20.0)            | 0         |
| Nausea                                  | 8 (53.3)               | 0         | 2 (13.3)            | 0         |
| Fatigue                                 | 6 (40.0)               | 0         | 4 (26.7)            | 0         |
| Hypocalcemia                            | 7 (46.7)               | 1 (6.7)   | 2 (13.3)            | 0         |
| Decreased platelet count                | 3 (20.0)               | 0         | 4 (26.7)            | 0         |
| Memory impairment                       | 4 (26.7)               | 0         | 3 (20.0)            | 0         |
| Confusion                               | 6 (40.0)               | 0         | 1 (6.7)             | 0         |
| Diarrhea                                | 5 (33.3)               | 0         | 2 (13.3)            | 1 (6.7)   |
| Cognitive disturbance                   | 5 (33.3)               | 0         | 1 (6.7)             | 0         |
| Seizure                                 | 5 (33.3)               | 0         | 1 (6.7)             | 0         |
| Hypertension                            | 5 (33.3)               | 1 (6.7)   | 1 (6.7)             | 0         |
| Hyponatremia                            | 3 (20.0)               | 1 (6.7)   | 3 (20.0)            | 1 (6.7)   |
| Cough                                   | 3 (20.0)               | 0         | 3 (20.0)            | 0         |
| Aspartate aminotransferase increased    | 5 (33.3)               | 1 (6.7)   | 1 (6.7)             | 0         |
| Alanine aminotransferase increased      | 4 (26.7)               | 1 (6.7)   | 1 (6.7)             | 0         |
| Alkaline phosphatase increased          | 2 (13.3)               | 0         | 3 (20.0)            | 0         |
| Constipation                            | 2 (13.3)               | 0         | 3 (20.0)            | 0         |
| Paresthesia                             | 1 (6.7)                | 0         | 4 (26.7)            | 0         |
| Decreased white blood cell count        | 3 (20.0)               | 0         | 2 (13.3)            | 1 (6.7)   |
| Hypoalbuminemia                         | 3 (20.0)               | 0         | 2 (13.3)            | 0         |
| Dysphasia                               | 1 (6.7)                | 0         | 4 (26.7)            | 1 (6.7)   |
| Anorexia                                | 4 (26.7)               | 0         | 0                   | 0         |
| Back pain                               | 2 (13.3)               | 0         | 2 (13.3)            | 0         |

|                                                 |          |          |          |         |
|-------------------------------------------------|----------|----------|----------|---------|
| Dizziness                                       | 1 (6.7)  | 0        | 3 (20.0) | 0       |
| Gait disturbance                                | 3 (20.0) | 0        | 1 (6.7)  | 1 (6.7) |
| Hypomagnesemia                                  | 4 (26.7) | 0        | 0        | 0       |
| Decreased neutrophil count                      | 3 (20.0) | 0        | 1 (6.7)  | 0       |
| Optic nerve disorder                            | 4 (26.7) | 0        | 0        | 0       |
| Sinus bradycardia                               | 3 (20.0) | 0        | 1 (6.7)  | 0       |
| Anxiety                                         | 2 (13.3) | 0        | 1 (6.7)  | 0       |
| Creatinine increased                            | 3 (20.0) | 0        | 0        | 0       |
| Dyspnea                                         | 3 (20.0) | 0        | 0        | 0       |
| Facial edema                                    | 2 (13.3) | 0        | 1 (6.7)  | 0       |
| Localized edema                                 | 2 (13.3) | 0        | 1 (6.7)  | 0       |
| Pruritis                                        | 1 (6.7)  | 0        | 2 (13.3) | 0       |
| Maculopapular rash                              | 3 (20.0) | 0        | 0        | 0       |
| Sinus tachycardia                               | 3 (20.0) | 0        | 0        | 0       |
| Thromboembolic event                            | 2 (13.3) | 0        | 1 (6.7)  | 0       |
| Urinary incontinence                            | 3 (20.0) | 0        | 0        | 0       |
| Vomiting                                        | 2 (13.3) | 0        | 1 (6.7)  | 0       |
| Upper respiratory infection                     | 2 (13.3) | 0        | 0        | 0       |
| Respiratory, thoracic and mediastinal disorders | 2 (13.3) | 0        | 0        | 0       |
| Pain                                            | 2 (13.3) | 0        | 0        | 0       |
| INR increased                                   | 2 (13.3) | 0        | 0        | 0       |
| Hypotension                                     | 2 (13.3) | 0        | 0        | 0       |
| Hypophosphatemia                                | 2 (13.3) | 0        | 0        | 0       |
| Hypernatremia                                   | 2 (13.3) | 0        | 0        | 0       |
| Hyperkalemia                                    | 2 (13.3) | 0        | 0        | 0       |
| Limb edema                                      | 2 (13.3) | 0        | 0        | 0       |
| Arthralgia                                      | 2 (13.3) | 0        | 0        | 0       |
| Dyspepsia                                       | 0        | 0        | 2 (13.3) | 0       |
| Immune mediated                                 |          |          |          |         |
| Any                                             | 9 (60.0) | 2 (13.3) | 3 (20.0) | 1 (6.7) |
| Hypothyroidism                                  | 7 (46.7) | 0        | 0        | 0       |
| CNS localized edema                             | 4 (26.7) | 1 (6.7)  | 2 (13.3) | 1 (6.7) |
| Hyperthyroidism                                 | 4 (26.7) | 0        | 1 (6.7)  | 0       |
| Pneumonitis                                     | 3 (20.0) | 1 (6.7)  | 0        | 0       |
| Allergic reaction                               | 1 (6.7)  | 0        | 0        | 0       |

Supplementary Table 2

| Differential intratumoral gene expression, neoadjuvant versus adjuvant |                  |             |              |
|------------------------------------------------------------------------|------------------|-------------|--------------|
| Gene                                                                   | Log2 fold change | 95% CI      | P-value (BH) |
| IL1B                                                                   | 2.43             | 1.4 – 3.45  | 0.02         |
| IFIT1                                                                  | 1.54             | 0.87 – 2.21 | 0.02         |
| PTGS2                                                                  | 3.04             | 1.71 – 4.37 | 0.02         |
| MARCO                                                                  | 2.22             | 1.22 – 3.22 | 0.02         |
| CCL4                                                                   | 2.56             | 1.38 – 3.73 | 0.02         |
| CCL8                                                                   | 2.09             | 1.12 – 3.05 | 0.02         |
| CD83                                                                   | 1.3              | 0.69 – 1.9  | 0.02         |
| CCL3L1                                                                 | 2.37             | 1.19 – 3.54 | 0.03         |
| CCL3                                                                   | 2.42             | 1.2 – 3.64  | 0.03         |
| HAMP                                                                   | 1.67             | 0.82 – 2.53 | 0.04         |

Supplementary Table 3

| <b>18 gene interferon-<math>\gamma</math>-related gene signature</b>        |                      |
|-----------------------------------------------------------------------------|----------------------|
| CCL5                                                                        | CD27                 |
| CD274                                                                       | CD276                |
| CD8A                                                                        | CMKLR1               |
| CXCL9                                                                       | CXCR6                |
| HLA-DQA1                                                                    | HLA-DRB1             |
| HLA-E                                                                       | IDO1                 |
| LAG3                                                                        | NKG7                 |
| PDCD1LG2                                                                    | PSMB10               |
| STAT1                                                                       | TIGIT                |
| <b>18 gene interferon-<math>\gamma</math>-related gene signature scores</b> |                      |
| Neoadjuvant, mean (SEM)                                                     | Adjuvant, mean (SEM) |
| 2.17 (0.07)                                                                 | 2.00 (0.03)          |

Supplementary Table 4

| Histological CD8 TIL and PD-L1 Expression Characteristics |                       |                    |
|-----------------------------------------------------------|-----------------------|--------------------|
|                                                           | Neoadjuvant<br>(n=15) | Adjuvant<br>(n=15) |
| PD-L1 Expression Pattern                                  |                       |                    |
| Constitutive                                              | 1                     | 4                  |
| Focal                                                     | 7                     | 3                  |
| Negative                                                  | 5                     | 6                  |
| Not Determinable                                          | 2                     | 2                  |
| CD8 TIL Quantity                                          |                       |                    |
| High (>2% of Total Cells)                                 | 2                     | 0                  |
| Moderate (0.5-2% of Total Cells)                          | 6                     | 9                  |
| Low (<0.5% of Total Cells)                                | 5                     | 4                  |
| Not Determinable                                          | 2                     | 2                  |
| Focal PD-L1, Moderate to High CD8 TIL                     |                       |                    |
| Constitutive PD-L1, Low to Moderate CD8 TIL               | 1                     | 4                  |
| Negative PD-L1, Low CD8 TIL                               | 5                     | 6                  |

Supplementary Table 5

|                                        | logHR  | HR   | SE(logHR) | P value |
|----------------------------------------|--------|------|-----------|---------|
| Age                                    | 0.016  | 1.02 | 0.022     | 0.47    |
| Sex (1 = female)                       | -0.241 | 0.79 | 0.535     | 0.65    |
| Treatment (1 = neoadjuvant)            | -1.13  | 0.33 | 0.562     | 0.045   |
| IDH status (1 = mutant)                | -0.694 | 0.5  | 0.906     | 0.44    |
| Peripheral T cell receptor clonality*  | 0.392  | 1.48 | 0.254     | 0.12    |
| Tumor infiltrating lymphocyte density* | -0.329 | 0.72 | 0.309     | 0.29    |

Supplementary Table 6

| <b>Target (clone) - tag</b> | <b>Vendor</b> | <b>Catalog number</b> |
|-----------------------------|---------------|-----------------------|
| CD45RA (HI100) - 169Tm      | Fluidigm      | 3169008B              |
| CD69 (FN50) - 144Nd         | Fluidigm      | 3144018B              |
| CD4 (RPA-T4) - 145Nd        | Fluidigm      | 3145001B              |
| CD25 (2A3) - 143Nd          | (custom)      |                       |
| CD19 (HIB19) - 142Nd        | Fluidigm      | 3142001B              |
| CD274 (29E.2A3) - 148Nd     | Fluidigm      | 3148017B              |
| CD14 (M5E2) - 151Eu         | Fluidigm      | 3151009B              |
| CD279 (EH12.2H7) - 155Gd    | Fluidigm      | 3155009B              |
| CD33 (WM53) - 158Gd         | Fluidigm      | 3158001B              |
| CD8a (RPA-T8) - 146Nd       | Fluidigm      | 3146001B              |
| CD15 (W6D3) - 164Dy         | Fluidigm      | 3164001B              |
| CD16 (3G8) - 165Ho          | Fluidigm      | 3165001B              |
| CD3 (UCHT1) - 154Sm         | Fluidigm      | 3154003B              |
| CD11b (ICRF44) - 209Bi      | Fluidigm      | 3209003B              |
| HLA-DR (L243) - 174Yb       | Fluidigm      | 3174001B              |
| CD127 (A019D5) - 176Yb      | Fluidigm      | 3176004B              |
| CD38 (HIT2) - 172Yb         | Fluidigm      | 3172007B              |
| CD206 (15-2) - 168Er        | Fluidigm      | 3168008B              |
| TIM-3 (F38-2E2) - 153Eu     | Fluidigm      | 3153008B              |
| CD223 (LAG-3) - 150Nd       | (custom)      |                       |
| CD152 (14D3) - 161Dy        | Fluidigm      | 3161004B              |
| CD11c (Bu15) - 159Tb        | Fluidigm      | 3159001B              |
| CD27 (O323) - 167Er         | Fluidigm      | 3167002B              |
| CD56 (NCAM 16.2) - 163Dy    | Fluidigm      | 3163007B              |
